# Supplementary material for: Metabolomic reprogramming of the tumor microenvironment by dual arginase inhibitor OATD-02 boosts anticancer immunity
Source: Research Square preprint supplement (doi:10.21203/rs.3.rs-6305179/v1), 2025-04-01
Supplement: Supplementary file 1 [file a7faaed2848536b897675f74.docx]

**Supplementary material**


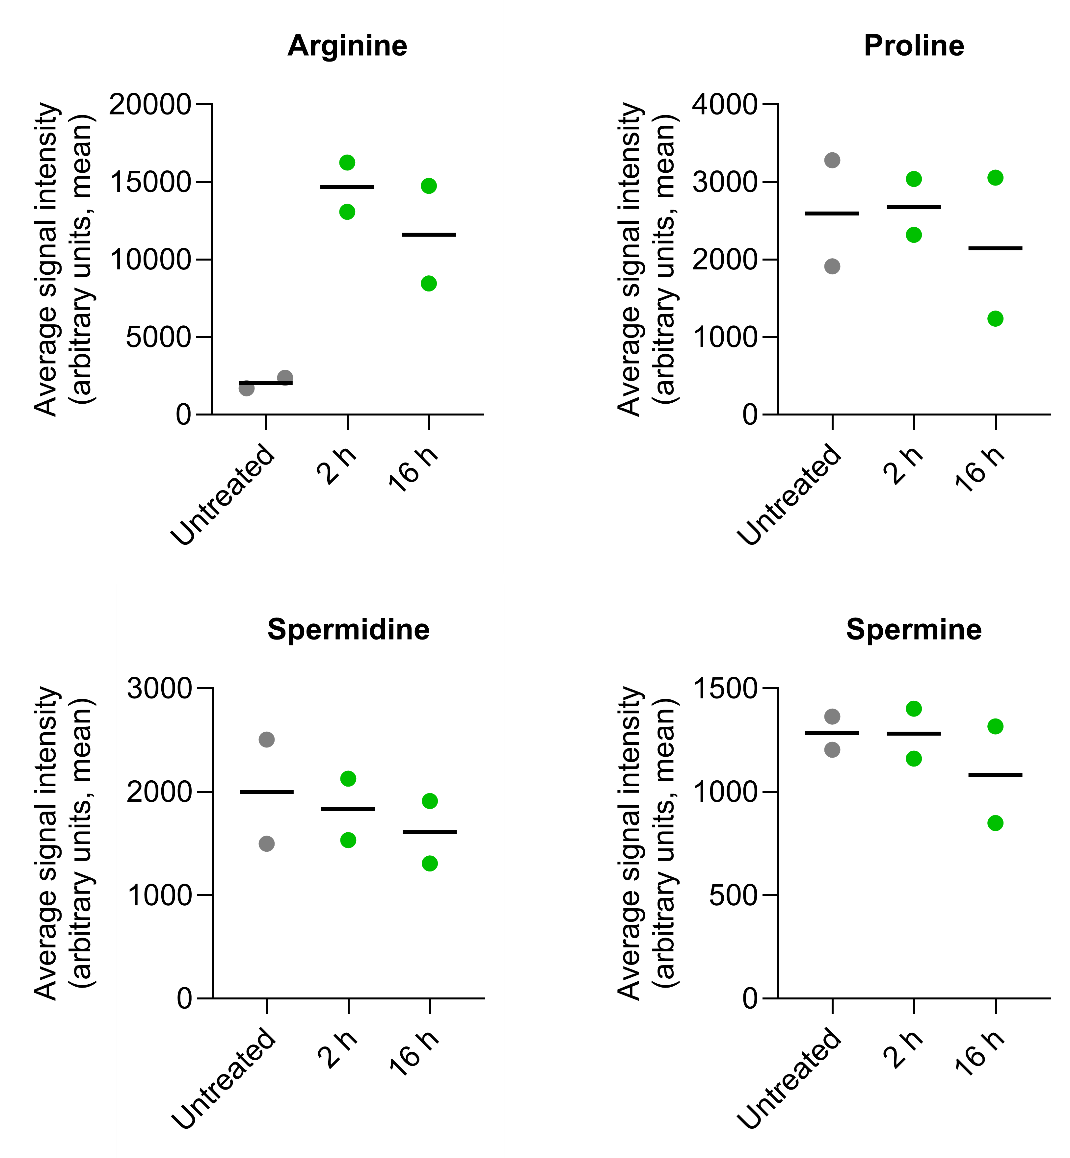


**Suppl. Figure 1.** **Quantification of L-arginine, proline, spermine, and spermidine levels in tumor sections of untreated and OATD-02-treated mice at 2 h and 16 h after the last dose.** Metabolite distribution was assessed using MALDI-MSI imaging. Each dot represents an individual tumor, and horizontal bars indicate the mean values for each group.
